# Supplementary material
Source: PubMed Central journal article supplement (PMC3896207)
Supplement: 1315179111_pnas.201315179SI.pdf [file 1315179111_pnas.201315179SI.pdf]

# Supporting Information

## Adler et al. 10.1073/pnas.1315179111

### Suggested Readings

References for the original sources of the TRY functional traits data used in our analysis.

- Atkin OK, Westbeek M, Cambridge ML, Lambers H, Pons TL (1997) Leaf respiration in light and darkness (a comparison of slow- and fast-growing poa species). *Plant Physiol* 113(3): 961–965.
- Atkin OK, Schortemeyer M, McFarlane N, Evans JR (1999) The response of fast- and slow-growing Acacia species to elevated atmospheric CO<sub>2</sub>: An analysis of the underlying components of relative growth rate. *Oecologia* 120(4):544–554.
- Blonder B, Violle C, Bentley LP, Enquist BJ (2011) Venation networks and the origin of the leaf economics spectrum. *Ecol Lett* 14(2):91–100.
- Campbell C, et al. (2007) Acclimation of photosynthesis and respiration is asynchronous in response to changes in temperature regardless of plant functional group. *New Phytol* 176(2):375–389.
- Castro-Díez P, Puyravaud JP, Cornelissen JHC, Villar-Salvador P (1998) Stem anatomy and relative growth rate in seedlings of a wide range of woody plant species and types. *Oecologia* 116(1-2):57–66.
- Chave J, et al. (2009) Towards a worldwide wood economics spectrum. *Ecol Lett* 12(4): 351–366.
- Cornelissen JHC (1996) An experimental comparison of leaf decomposition rates in a wide range of temperate plant species and types. *J Ecol* 84(4):573–582.
- Cornelissen JHC, et al. (2004) Leaf digestibility and litter decomposability are related in a wide range of subarctic plant species and types. *Funct Ecol* 18(6):779–786.
- Cornelissen JHC, et al. (2003) Functional traits of woody plants: Correspondence of species rankings between field adults and laboratory-grown seedlings? *J Veg Sci* 14(3):311–322.
- Cornwell WK, et al. (2008) Plant species traits are the predominant control on litter decomposition rates within biomes worldwide. *Ecol Lett* 11(10):1065–1071.
- Craine JM, et al. (2009) Global patterns of foliar nitrogen isotopes and their relationships with climate, mycorrhizal fungi, foliar nutrient concentrations, and nitrogen availability. *New Phytol* 183(4):980–992.
- Craine JM, Lee WG, Bond WJ, Williams RJ, Johnson LC (2005) Environmental constraints on a global relationship among leaf and root traits of grasses. *Ecology* 86(1):12–19.
- Díaz S, et al. (2004) The plant traits that drive ecosystems: Evidence from three continents. *J Veg Sci* 15(3):295–304.
- Fonseca CR, Overton JM, Collins B, Westoby M (2000) Shifts in trait-combinations along rainfall and phosphorus gradients. *J Ecol* 88(6):964–977.
- Freschet GT, Cornelissen JHC, Van Logtestijn RSP, Aerts R (2010) Evidence of the “plant economics spectrum” in a subarctic flora. *J Ecol* 98(2):362–373.
- Fyllas NM, et al. (2009) Basin-wide variations in foliar properties of Amazonian forest: Phylogeny, soils and climate. *Biogeosciences Discuss* 6(2):3707–3769.
- Garnier E, et al. (2007) Assessing the effects of land-use change on plant traits, communities and ecosystem functioning in grasslands: A standardized methodology and lessons from an application to 11 European sites. *Ann Bot (Lond)* 99(5):967–985.
- Gillison AN, Carpenter G (1997) A generic plant functional attribute set and grammar for dynamic vegetation description and analysis. *Funct Ecol* 11(6):775–783.
- Han W, Fang J, Guo D, Zhang Y (2005) Leaf nitrogen and phosphorus stoichiometry across 753 terrestrial plant species in China. *New Phytol* 168(2):377–385.
- Hickler T (1999) Plant Functional Types and Community Characteristics Along Environmental Gradients on Öland's Great Alvar. Master's thesis (University of Lund, Lund, Sweden).
- Kattge J, Knorr W, Raddatz T, Wirth C (2009) Quantifying photosynthetic capacity and its relationship to leaf nitrogen content for global-scale terrestrial biosphere models. *Glob Chang Biol* 15(4):976–991.
- Kazakou E, Vile D, Shipley B, Gallet C, Garnier E (2006) Co-variations in litter decomposition, leaf traits and plant growth in species from a Mediterranean old-field succession. *Funct Ecol* 20(1):21–30.
- Kerkhoff AJ, Fagan WF, Elser JJ, Enquist BJ (2006) Phylogenetic and growth form variation in the scaling of nitrogen and phosphorus in the seed plants. *Am Nat* 168(4):E103–E122.
- Kleyer M, et al. (2008) The LEDA Traitbase: A database of life-history traits of the Northwest European flora. *J Ecol* 96(6):1266–1274.
- Laughlin DC, Leppert JJ, Moore MM, Sieg CH (2010) A multi-trait test of the leaf-height-seed plant strategy scheme with 133 species from a pine forest flora. *Funct Ecol* 24(3):493–501.
- Louault F, Pillar Vd, Aufrère J, Garnier E, Soussana J-F (2005) Plant traits and functional types in response to reduced disturbance in a semi-natural grassland. *J Veg Sci* 16(2): 151–160.
- Loveys BR, et al. (2003) Thermal acclimation of leaf and root respiration: An investigation comparing inherently fast- and slow-growing plant species. *Glob Chang Biol* 9(4):895–910.
- Medlyn BE, et al. (1999) Effects of elevated [CO<sub>2</sub>] on photosynthesis in European forest species: A meta-analysis of model parameters. *Plant Cell Environ* 22(12):1475–1495.
- Messier J, McGill BJ, Lechowicz MJ (2010) How do traits vary across ecological scales? A case for trait-based ecology. *Ecol Lett* 13(7):838–848.
- Meziane D, Shipley B (1999) Interacting determinants of specific leaf area in 22 herbaceous species: Effects of irradiance and nutrient availability. *Plant Cell Environ* 22(5): 447–459.
- Moles AT, et al. (2005) A brief history of seed size. *Science* 307(5709):576–580.
- Nakahashi CD, Frole K, Sack L (2005) Bacterial leaf nodule symbiosis in *Ardisia* (Myrsinaceae): Does it contribute to seedling growth capacity? *Plant Biol (Stuttg)* 7(5):495–500.
- Niinemetts Ü (2001) Global-scale climatic controls of leaf dry mass per area, density, and thickness in trees and shrubs. *Ecology* 82(2):453–469.
- Ogaya R, Peñuelas J (2003) Comparative field study of *Quercus ilex* and *Phillyrea latifolia*: Photosynthetic response to experimental drought conditions. *Environ Exp Bot* 50(2): 137–148.
- Ordoñez JC, et al. (2010) Plant strategies in relation to resource supply in mesic to wet environments: Does theory mirror nature? *Am Nat* 175(2):225–239.
- Paola S, et al. (2009) Fire-related traits for plant species of the Mediterranean Basin. *Ecology* 90(5):1420.
- Peñuelas J, et al. (2010) Faster returns on “leaf economics” and different biogeochemical niche in invasive compared with native plant species. *Glob Chang Biol* 16(8):2171–2185.
- Poorter H, Niinemets U, Poorter L, Wright IJ, Villar R (2009) Causes and consequences of variation in leaf mass per area (LMA): A meta-analysis. *New Phytol* 182(3):565–588.
- Preston KA, Cornwell WK, Denoyer JL (2006) Wood density and vessel traits as distinct correlates of ecological strategy in 51 California coast range angiosperms. *New Phytol* 170(4):807–818.
- Pyankov VI, Kondratyuk AV, Shipley B (1999) Leaf structure and specific leaf mass: The alpine desert plants of the Eastern Pamirs, Tadjikistan. *New Phytol* 143(1):131–142.
- Quested HM, et al. (2003) Decomposition of sub-arctic plants with differing nitrogen economies: A functional role for hemiparasites. *Ecology* 84(12):3209–3221.
- Reich PB, Oleksyn J, Wright IJ (2009) Leaf phosphorus influences the photosynthesis-nitrogen relation: A cross-biome analysis of 314 species. *Oecologia* 160(2):207–212.
- Reich PB, et al. (2008) Scaling of respiration to nitrogen in leaves, stems and roots of higher land plants. *Ecol Lett* 11(8):793–801.
- Sack L, Cowan PD, Jaikumar N, Holbrook NM (2003) The “hydrology” of leaves: Co-ordination of structure and function in temperate woody species. *Plant Cell Environ* 26(8): 1343–1356.
- Sack L (2004) Responses of temperate woody seedlings to shade and drought: Do trade-offs limit potential niche differentiation? *Oikos* 107(Fasc. 1):110–127.
- Sack L, Melcher PJ, Liu WH, Middleton E, Pardee T (2006) How strong is intracanalopy leaf plasticity in temperate deciduous trees? *Am J Bot* 93(6):829–839.
- Shipley B, Lechowicz MJ (2000) The functional co-ordination of leaf morphology, nitrogen concentration, and gas exchange in 40 wetland species. *Ecoscience* 7(2):183–194.
- Shipley B (1995) Structured interspecific determinants of specific leaf area in 34 species of herbaceous angiosperms. *Funct Ecol* 9(2):312–319.
- Shipley B (2002) Trade-offs between net assimilation rate and specific leaf area in determining relative growth rate: Relationship with daily irradiance. *Funct Ecol* 16(5): 682–689.
- Shipley B, Parent M (1991) Germination responses of 64 wetland species in relation to seed size, minimum time to reproduction and seedling relative growth rate. *Funct Ecol* 5(1): 111–118.
- Shipley B, Vu T-T (2002) Dry matter content as a measure of dry matter concentration in plants and their parts. *New Phytol* 153(2):359–364.







**Table S1. Functional traits, growth forms, and biomes represented in the dataset of 222 species**

|                     | <i>n</i> |
|---------------------|----------|
| Functional trait    |          |
| Seed mass           | 193      |
| Wood density        | 72       |
| Leaf lifespan       | 27       |
| SLA                 | 135      |
| Leaf N              | 106      |
| Growth form         |          |
| Perennial herb      | 117      |
| Palm                | 9        |
| Shrub               | 26       |
| Succulent           | 3        |
| Tree                | 67       |
| Biome               |          |
| Arctic              | 10       |
| Desert              | 21       |
| Temperate forest    | 102      |
| Temperate grassland | 28       |
| Tropical forest     | 46       |
| Tropical savanna    | 15       |
| Arctic              | 10       |

*n* refers to the number of species. SLA, specific leaf area.

**Table S2. Dirichlet regression results for models of vital rate elasticities including growth form as a covariate**

| Elasticity           | Parameter    | Coefficient | SE    | Z      | P     |
|----------------------|--------------|-------------|-------|--------|-------|
| <b>Seed mass</b>     |              |             |       |        |       |
| Survival             | Intercept    | 0.122       | 0.109 | 1.119  | 0.263 |
| Survival             | Trait effect | 0.151       | 0.039 | 3.882  | 0     |
| Survival             | Palm         | 2.484       | 0.503 | 4.94   | 0     |
| Survival             | Shrub        | 0.741       | 0.256 | 2.891  | 0.004 |
| Survival             | Succulent    | 1.795       | 0.685 | 2.62   | 0.009 |
| Survival             | Tree         | 0.505       | 0.257 | 1.962  | 0.05  |
| Growth               | Intercept    | 0.148       | 0.108 | 1.367  | 0.171 |
| Growth               | Trait effect | 0.041       | 0.034 | 1.202  | 0.229 |
| Growth               | Palm         | 0.417       | 0.475 | 0.878  | 0.38  |
| Growth               | Shrub        | 0.473       | 0.25  | 1.89   | 0.059 |
| Growth               | Succulent    | -0.256      | 0.621 | -0.413 | 0.68  |
| Growth               | Tree         | -0.744      | 0.243 | -3.067 | 0.002 |
| Fecundity            | Intercept    | -0.725      | 0.1   | -7.27  | 0     |
| Fecundity            | Trait effect | 0.047       | 0.034 | 1.389  | 0.165 |
| Fecundity            | Palm         | 0.51        | 0.468 | 1.088  | 0.276 |
| Fecundity            | Shrub        | 0.316       | 0.255 | 1.24   | 0.215 |
| Fecundity            | Succulent    | 0.122       | 0.603 | 0.203  | 0.84  |
| Fecundity            | Tree         | -0.311      | 0.25  | -1.245 | 0.213 |
| <b>Wood density</b>  |              |             |       |        |       |
| Survival             | Intercept    | -0.346      | 0.458 | -0.756 | 0.45  |
| Survival             | Trait effect | 0.286       | 1.165 | 0.246  | 0.806 |
| Survival             | Palm         | 6.185       | 0.827 | 7.481  | 0     |
| Survival             | Shrub        | 0.835       | 0.66  | 1.265  | 0.206 |
| Survival             | Tree         | 1.361       | 0.524 | 2.595  | 0.009 |
| Growth               | Intercept    | 0.583       | 0.44  | 1.324  | 0.185 |
| Growth               | Trait effect | -0.148      | 0.904 | -0.164 | 0.87  |
| Growth               | Palm         | 2.717       | 0.849 | 3.199  | 0.001 |
| Growth               | Shrub        | -0.091      | 0.662 | -0.138 | 0.89  |
| Growth               | Tree         | -1.075      | 0.455 | -2.36  | 0.018 |
| Fecundity            | Intercept    | -0.209      | 0.417 | -0.5   | 0.617 |
| Fecundity            | Trait effect | -0.334      | 0.895 | -0.373 | 0.709 |
| Fecundity            | Palm         | 2.634       | 0.862 | 3.057  | 0.002 |
| Fecundity            | Shrub        | -0.749      | 0.643 | -1.164 | 0.244 |
| Fecundity            | Tree         | -0.506      | 0.433 | -1.168 | 0.243 |
| <b>Leaf lifespan</b> |              |             |       |        |       |
| Survival             | Intercept    | -0.044      | 0.564 | -0.078 | 0.938 |
| Survival             | Trait effect | 0.044       | 0.358 | 0.124  | 0.902 |
| Survival             | Shrub        | 1.751       | 0.768 | 2.279  | 0.023 |
| Survival             | Tree         | 1.209       | 0.802 | 1.507  | 0.132 |
| Growth               | Intercept    | -0.266      | 0.528 | -0.504 | 0.614 |
| Growth               | Trait effect | -0.51       | 0.366 | -1.393 | 0.164 |
| Growth               | Shrub        | 1.551       | 0.69  | 2.249  | 0.025 |
| Growth               | Tree         | 1.8         | 0.877 | 2.053  | 0.04  |
| Fecundity            | Intercept    | -1.029      | 0.524 | -1.962 | 0.05  |
| Fecundity            | Trait effect | -0.333      | 0.325 | -1.026 | 0.305 |
| Fecundity            | Shrub        | 1.956       | 0.681 | 2.871  | 0.004 |
| Fecundity            | Tree         | 1.576       | 0.722 | 2.182  | 0.029 |
| <b>SLA</b>           |              |             |       |        |       |
| Survival             | Intercept    | -0.138      | 0.642 | -0.215 | 0.83  |
| Survival             | Trait effect | 0.048       | 0.208 | 0.234  | 0.815 |
| Survival             | Palm         | 2.575       | 0.593 | 4.345  | 0     |
| Survival             | Shrub        | 1.013       | 0.312 | 3.253  | 0.001 |
| Survival             | Tree         | 1.06        | 0.286 | 3.702  | 0     |
| Growth               | Intercept    | -0.442      | 0.593 | -0.746 | 0.456 |
| Growth               | Trait effect | 0.086       | 0.189 | 0.454  | 0.649 |
| Growth               | Palm         | 0.792       | 0.556 | 1.425  | 0.154 |
| Growth               | Shrub        | 0.722       | 0.305 | 2.366  | 0.018 |
| Growth               | Tree         | -0.326      | 0.278 | -1.175 | 0.24  |
| Fecundity            | Intercept    | -2.607      | 0.523 | -4.985 | 0     |
| Fecundity            | Trait effect | 0.571       | 0.175 | 3.267  | 0.001 |
| Fecundity            | Palm         | 0.958       | 0.528 | 1.817  | 0.069 |
| Fecundity            | Shrub        | 0.827       | 0.274 | 3.016  | 0.003 |

**Table S2. Cont.**

| Elasticity | Parameter    | Coefficient | SE    | Z      | P     |
|------------|--------------|-------------|-------|--------|-------|
| Fecundity  | Tree         | 0.408       | 0.235 | 1.736  | 0.083 |
| Leaf N     |              |             |       |        |       |
| Survival   | Intercept    | -0.348      | 1.066 | -0.326 | 0.744 |
| Survival   | Trait effect | 0.138       | 0.341 | 0.405  | 0.686 |
| Survival   | Palm         | 2.66        | 0.562 | 4.733  | 0     |
| Survival   | Shrub        | 1.114       | 0.349 | 3.189  | 0.001 |
| Survival   | Tree         | 1.237       | 0.281 | 4.398  | 0     |
| Growth     | Intercept    | -0.259      | 1.122 | -0.231 | 0.818 |
| Growth     | Trait effect | 0.044       | 0.351 | 0.127  | 0.899 |
| Growth     | Palm         | 0.914       | 0.559 | 1.635  | 0.102 |
| Growth     | Shrub        | 0.741       | 0.345 | 2.151  | 0.031 |
| Growth     | Tree         | -0.378      | 0.291 | -1.298 | 0.194 |
| Fecundity  | Intercept    | -3.321      | 0.874 | -3.799 | 0     |
| Fecundity  | Trait effect | 0.768       | 0.282 | 2.724  | 0.006 |
| Fecundity  | Palm         | 1.17        | 0.534 | 2.191  | 0.028 |
| Fecundity  | Shrub        | 0.501       | 0.318 | 1.577  | 0.115 |
| Fecundity  | Tree         | 0.341       | 0.238 | 1.435  | 0.151 |

For each model, the overall intercept corresponds to the herbaceous perennial growth form; the other growth form coefficients are deviations from this baseline.

**Table S3. Dirichlet regression results for models of vital rate elasticities including biome as a covariate**

| Elasticity           | Parameter           | Coefficient | SE    | Z      | P     |
|----------------------|---------------------|-------------|-------|--------|-------|
| <b>Seed mass</b>     |                     |             |       |        |       |
| Survival             | Intercept           | 0.82        | 0.432 | 1.901  | 0.057 |
| Survival             | Trait effect        | 0.18        | 0.037 | 4.912  | 0     |
| Survival             | Desert              | -0.908      | 0.501 | -1.811 | 0.07  |
| Survival             | Temperate forest    | -0.557      | 0.45  | -1.238 | 0.216 |
| Survival             | Temperate grassland | -0.702      | 0.487 | -1.442 | 0.149 |
| Survival             | Tropical forest     | -0.367      | 0.526 | -0.697 | 0.486 |
| Survival             | Tropical grassland  | -0.305      | 0.582 | -0.524 | 0.601 |
| Growth               | Intercept           | 0.002       | 0.404 | 0.004  | 0.997 |
| Growth               | Trait effect        | -0.068      | 0.033 | -2.031 | 0.042 |
| Growth               | Desert              | -0.006      | 0.474 | -0.012 | 0.991 |
| Growth               | Temperate forest    | 0.081       | 0.425 | 0.191  | 0.849 |
| Growth               | Temperate grassland | 0.168       | 0.461 | 0.364  | 0.716 |
| Growth               | Tropical forest     | 0.33        | 0.508 | 0.649  | 0.516 |
| Growth               | Tropical grassland  | 0.432       | 0.54  | 0.801  | 0.423 |
| Fecundity            | Intercept           | -1.546      | 0.36  | -4.291 | 0     |
| Fecundity            | Trait effect        | -0.005      | 0.028 | -0.175 | 0.861 |
| Fecundity            | Desert              | 0.733       | 0.432 | 1.697  | 0.09  |
| Fecundity            | Temperate forest    | 0.837       | 0.384 | 2.179  | 0.029 |
| Fecundity            | Temperate grassland | 1.177       | 0.422 | 2.786  | 0.005 |
| Fecundity            | Tropical forest     | 0.812       | 0.443 | 1.831  | 0.067 |
| Fecundity            | Tropical grassland  | 1.293       | 0.501 | 2.581  | 0.01  |
| <b>Wood density</b>  |                     |             |       |        |       |
| Survival             | Intercept           | 1.565       | 0.767 | 2.04   | 0.041 |
| Survival             | Trait effect        | 1.902       | 0.924 | 2.059  | 0.04  |
| Survival             | Temperate forest    | -2.347      | 0.865 | -2.714 | 0.007 |
| Survival             | Temperate grassland | -1.968      | 0.992 | -1.983 | 0.047 |
| Survival             | Tropical forest     | -1.224      | 0.952 | -1.286 | 0.199 |
| Survival             | Tropical grassland  | -2.006      | 1.094 | -1.833 | 0.067 |
| Growth               | Intercept           | 1.546       | 0.856 | 1.806  | 0.071 |
| Growth               | Trait effect        | -0.947      | 0.957 | -0.989 | 0.323 |
| Growth               | Temperate forest    | -1.803      | 0.794 | -2.271 | 0.023 |
| Growth               | Temperate grassland | -0.939      | 0.905 | -1.038 | 0.299 |
| Growth               | Tropical forest     | -1.488      | 0.809 | -1.839 | 0.066 |
| Growth               | Tropical grassland  | -1.185      | 0.964 | -1.228 | 0.219 |
| Fecundity            | Intercept           | 0.722       | 0.811 | 0.891  | 0.373 |
| Fecundity            | Trait effect        | -0.392      | 0.902 | -0.434 | 0.664 |
| Fecundity            | Temperate forest    | -1.608      | 0.784 | -2.053 | 0.04  |
| Fecundity            | Temperate grassland | -1.023      | 0.899 | -1.138 | 0.255 |
| Fecundity            | Tropical forest     | -1.404      | 0.806 | -1.742 | 0.081 |
| Fecundity            | Tropical grassland  | -1.372      | 0.965 | -1.421 | 0.155 |
| <b>Leaf lifespan</b> |                     |             |       |        |       |
| Survival             | Intercept           | -1.216      | 0.843 | -1.443 | 0.149 |
| Survival             | Trait effect        | 1.129       | 0.335 | 3.375  | 0.001 |
| Survival             | Desert              | 4.642       | 1.041 | 4.459  | 0     |
| Survival             | Temperate forest    | 0.11        | 0.831 | 0.132  | 0.895 |
| Survival             | Temperate grassland | -1.48       | 1.274 | -1.161 | 0.246 |
| Survival             | Tropical forest     | 0.044       | 0.94  | 0.047  | 0.963 |
| Growth               | Intercept           | -0.773      | 0.745 | -1.038 | 0.299 |
| Growth               | Trait effect        | 0.476       | 0.246 | 1.931  | 0.054 |
| Growth               | Desert              | 4.911       | 1.005 | 4.886  | 0     |
| Growth               | Temperate forest    | -0.516      | 0.761 | -0.678 | 0.498 |
| Growth               | Temperate grassland | 0.748       | 1.013 | 0.739  | 0.46  |
| Growth               | Tropical forest     | -0.712      | 0.957 | -0.744 | 0.457 |
| Fecundity            | Intercept           | -2.561      | 0.655 | -3.91  | 0     |
| Fecundity            | Trait effect        | 0.143       | 0.24  | 0.597  | 0.55  |
| Fecundity            | Desert              | 6.75        | 0.928 | 7.272  | 0     |
| Fecundity            | Temperate forest    | 1.932       | 0.664 | 2.908  | 0.004 |
| Fecundity            | Temperate grassland | 2.697       | 0.986 | 2.736  | 0.006 |
| Fecundity            | Tropical forest     | 1.829       | 0.813 | 2.25   | 0.024 |
| <b>SLA</b>           |                     |             |       |        |       |
| Survival             | Intercept           | 1.402       | 0.626 | 2.239  | 0.025 |
| Survival             | Trait effect        | -0.274      | 0.188 | -1.453 | 0.146 |

**Table S3. Cont.**

| Elasticity    | Parameter           | Coefficient | SE    | Z      | P     |
|---------------|---------------------|-------------|-------|--------|-------|
| Survival      | Desert              | -1.197      | 0.571 | -2.094 | 0.036 |
| Survival      | Temperate forest    | -0.296      | 0.423 | -0.701 | 0.483 |
| Survival      | Temperate grassland | -0.571      | 0.481 | -1.187 | 0.235 |
| Survival      | Tropical forest     | 0.407       | 0.47  | 0.867  | 0.386 |
| Survival      | Tropical grassland  | 1.36        | 0.624 | 2.18   | 0.029 |
| Growth        | Intercept           | -0.813      | 0.598 | -1.359 | 0.174 |
| Growth        | Trait effect        | 0.324       | 0.157 | 2.069  | 0.039 |
| Growth        | Desert              | 0.275       | 0.599 | 0.459  | 0.646 |
| Growth        | Temperate forest    | -0.347      | 0.4   | -0.866 | 0.386 |
| Growth        | Temperate grassland | -0.369      | 0.46  | -0.802 | 0.422 |
| Growth        | Tropical forest     | -0.414      | 0.439 | -0.941 | 0.347 |
| Growth        | Tropical grassland  | 1.893       | 0.656 | 2.887  | 0.004 |
| Fecundity     | Intercept           | -2.663      | 0.551 | -4.829 | 0     |
| Fecundity     | Trait effect        | 0.448       | 0.163 | 2.753  | 0.006 |
| Fecundity     | Desert              | 0.522       | 0.519 | 1.006  | 0.315 |
| Fecundity     | Temperate forest    | 0.687       | 0.36  | 1.906  | 0.057 |
| Fecundity     | Temperate grassland | 0.732       | 0.423 | 1.732  | 0.083 |
| Fecundity     | Tropical forest     | 0.452       | 0.396 | 1.141  | 0.254 |
| Fecundity     | Tropical grassland  | 2.264       | 0.586 | 3.861  | 0     |
| <b>Leaf N</b> |                     |             |       |        |       |
| Survival      | Intercept           | -1.376      | 1.045 | -1.317 | 0.188 |
| Survival      | Trait effect        | 0.662       | 0.317 | 2.09   | 0.037 |
| Survival      | Desert              | 0.576       | 0.678 | 0.849  | 0.396 |
| Survival      | Temperate forest    | -0.491      | 0.464 | -1.058 | 0.29  |
| Survival      | Temperate grassland | -0.477      | 0.555 | -0.858 | 0.391 |
| Survival      | Tropical forest     | 0.99        | 0.509 | 1.947  | 0.052 |
| Survival      | Tropical grassland  | 1.48        | 0.558 | 2.653  | 0.008 |
| Growth        | Intercept           | -2.308      | 0.944 | -2.444 | 0.015 |
| Growth        | Trait effect        | 0.776       | 0.293 | 2.652  | 0.008 |
| Growth        | Desert              | 1.199       | 0.668 | 1.794  | 0.073 |
| Growth        | Temperate forest    | -0.451      | 0.432 | -1.043 | 0.297 |
| Growth        | Temperate grassland | -0.012      | 0.536 | -0.023 | 0.982 |
| Growth        | Tropical forest     | -0.214      | 0.461 | -0.465 | 0.642 |
| Growth        | Tropical grassland  | 1.408       | 0.534 | 2.638  | 0.008 |
| Fecundity     | Intercept           | -4.677      | 0.905 | -5.168 | 0     |
| Fecundity     | Trait effect        | 1.028       | 0.274 | 3.749  | 0     |
| Fecundity     | Desert              | 1.997       | 0.631 | 3.166  | 0.002 |
| Fecundity     | Temperate forest    | 0.689       | 0.385 | 1.787  | 0.074 |
| Fecundity     | Temperate grassland | 0.917       | 0.485 | 1.891  | 0.059 |
| Fecundity     | Tropical forest     | 0.755       | 0.417 | 1.809  | 0.07  |
| Fecundity     | Tropical grassland  | 2.34        | 0.507 | 4.619  | 0     |

For each model, the overall intercept corresponds to the Arctic biome; the other biome coefficients are deviations from this baseline.

**Table S4. PGLS regression results for models of vital rate elasticities including growth form as a covariate**

| Elasticity           | Parameter    | Coefficient | SE    | t      | P      |
|----------------------|--------------|-------------|-------|--------|--------|
| <b>Seed mass</b>     |              |             |       |        |        |
| Survival             | Intercept    | 0.789       | 2.336 | 0.338  | 0.7360 |
| Survival             | Trait effect | 0.215       | 0.066 | 3.231  | 0.0015 |
| Survival             | Palm         | 1.159       | 2.540 | 0.456  | 0.6486 |
| Survival             | Shrub        | 0.641       | 0.538 | 1.193  | 0.2346 |
| Survival             | Succulent    | 1.361       | 1.907 | 0.714  | 0.4762 |
| Survival             | Tree         | 1.164       | 0.700 | 1.663  | 0.0980 |
| Growth               | Intercept    | -1.616      | 2.061 | -0.784 | 0.4339 |
| Growth               | Trait effect | -0.132      | 0.059 | -2.243 | 0.0261 |
| Growth               | Palm         | -1.431      | 2.241 | -0.639 | 0.5239 |
| Growth               | Shrub        | -0.566      | 0.475 | -1.194 | 0.2341 |
| Growth               | Succulent    | -1.183      | 1.683 | -0.703 | 0.4829 |
| Growth               | Tree         | -1.129      | 0.618 | -1.828 | 0.0691 |
| Fecundity            | Intercept    | -5.131      | 4.561 | -1.125 | 0.2620 |
| Fecundity            | Trait effect | 0.045       | 0.130 | 0.348  | 0.7279 |
| Fecundity            | Palm         | 0.655       | 4.958 | 0.132  | 0.8950 |
| Fecundity            | Shrub        | 2.327       | 1.050 | 2.216  | 0.0279 |
| Fecundity            | Succulent    | 0.085       | 3.723 | 0.023  | 0.9818 |
| Fecundity            | Tree         | 0.921       | 1.367 | 0.674  | 0.5011 |
| <b>Wood density</b>  |              |             |       |        |        |
| Survival             | Intercept    | -1.751      | 2.365 | -0.740 | 0.4617 |
| Survival             | Trait effect | 4.099       | 1.844 | 2.223  | 0.0296 |
| Survival             | Palm         | 3.152       | 2.969 | 1.062  | 0.2922 |
| Survival             | Shrub        | 0.933       | 1.461 | 0.638  | 0.5255 |
| Survival             | Tree         | 2.650       | 1.205 | 2.200  | 0.0312 |
| Growth               | Intercept    | 0.048       | 2.316 | 0.021  | 0.9834 |
| Growth               | Trait effect | -4.179      | 1.805 | -2.315 | 0.0237 |
| Growth               | Palm         | -2.208      | 2.907 | -0.759 | 0.4503 |
| Growth               | Shrub        | -0.062      | 1.431 | -0.044 | 0.9654 |
| Growth               | Tree         | -1.384      | 1.179 | -1.174 | 0.2447 |
| Fecundity            | Intercept    | -0.732      | 2.686 | -0.272 | 0.7861 |
| Fecundity            | Trait effect | -4.787      | 2.093 | -2.287 | 0.0254 |
| Fecundity            | Palm         | -2.300      | 3.371 | -0.682 | 0.4975 |
| Fecundity            | Shrub        | -2.849      | 1.659 | -1.717 | 0.0906 |
| Fecundity            | Tree         | -1.172      | 1.368 | -0.857 | 0.3946 |
| <b>Lead lifespan</b> |              |             |       |        |        |
| Survival             | Intercept    | -1.795      | 1.652 | -1.087 | 0.2884 |
| Survival             | Trait effect | 1.279       | 0.363 | 3.520  | 0.0018 |
| Survival             | Shrub        | 0.710       | 0.965 | 0.736  | 0.4693 |
| Survival             | Tree         | -0.375      | 0.683 | -0.549 | 0.5884 |
| Growth               | Intercept    | -0.942      | 3.267 | -0.288 | 0.7757 |
| Growth               | Trait effect | -0.881      | 0.719 | -1.226 | 0.2327 |
| Growth               | Shrub        | 0.035       | 1.909 | 0.018  | 0.9855 |
| Growth               | Tree         | 0.596       | 1.351 | 0.441  | 0.6632 |
| Fecundity            | Intercept    | -5.103      | 4.036 | -1.264 | 0.2187 |
| Fecundity            | Trait effect | -0.120      | 0.888 | -0.136 | 0.8933 |
| Fecundity            | Shrub        | 2.242       | 2.358 | 0.951  | 0.3517 |
| Fecundity            | Tree         | 1.929       | 1.669 | 1.155  | 0.2599 |
| <b>SLA</b>           |              |             |       |        |        |
| Survival             | Intercept    | 2.019       | 2.853 | 0.708  | 0.4804 |
| Survival             | Trait effect | -0.352      | 0.342 | -1.030 | 0.3049 |
| Survival             | Palm         | 1.452       | 2.988 | 0.486  | 0.6279 |
| Survival             | Shrub        | -0.063      | 0.844 | -0.075 | 0.9407 |
| Survival             | Tree         | 1.832       | 0.843 | 2.172  | 0.0316 |
| Growth               | Intercept    | -3.064      | 2.776 | -1.104 | 0.2717 |
| Growth               | Trait effect | 0.228       | 0.333 | 0.684  | 0.4952 |
| Growth               | Palm         | -1.128      | 2.907 | -0.388 | 0.6987 |
| Growth               | Shrub        | 0.305       | 0.821 | 0.372  | 0.7106 |
| Growth               | Tree         | -1.064      | 0.821 | -1.296 | 0.1972 |
| Fecundity            | Intercept    | -4.402      | 5.634 | -0.781 | 0.4359 |
| Fecundity            | Trait effect | 0.112       | 0.675 | 0.167  | 0.8680 |
| Fecundity            | Palm         | 3.251       | 5.900 | 0.551  | 0.5825 |
| Fecundity            | Shrub        | 0.835       | 1.666 | 0.501  | 0.6173 |

**Table S4. Cont.**

| Elasticity | Parameter    | Coefficient | SE    | <i>t</i> | <i>P</i> |
|------------|--------------|-------------|-------|----------|----------|
| Fecundity  | Tree         | -0.175      | 1.665 | -0.105   | 0.9166   |
| Leaf N     |              |             |       |          |          |
| Survival   | Intercept    | -0.521      | 2.298 | -0.227   | 0.8212   |
| Survival   | Trait effect | 0.583       | 0.366 | 1.592    | 0.1145   |
| Survival   | Palm         | 1.711       | 2.158 | 0.793    | 0.4297   |
| Survival   | Shrub        | 0.199       | 0.621 | 0.320    | 0.7496   |
| Survival   | Tree         | 2.174       | 0.608 | 3.578    | 0.0005   |
| Growth     | Intercept    | -0.494      | 2.302 | -0.215   | 0.8304   |
| Growth     | Trait effect | -0.733      | 0.367 | -1.999   | 0.0483   |
| Growth     | Palm         | -1.344      | 2.161 | -0.622   | 0.5354   |
| Growth     | Shrub        | 0.278       | 0.622 | 0.448    | 0.6553   |
| Growth     | Tree         | -1.498      | 0.609 | -2.461   | 0.0156   |
| Fecundity  | Intercept    | -10.741     | 5.943 | -1.807   | 0.0737   |
| Fecundity  | Trait effect | 2.152       | 0.947 | 2.274    | 0.0251   |
| Fecundity  | Palm         | 4.709       | 5.582 | 0.844    | 0.4008   |
| Fecundity  | Shrub        | 0.355       | 1.606 | 0.221    | 0.8256   |
| Fecundity  | Tree         | 0.488       | 1.572 | 0.310    | 0.7570   |

For each model, the overall intercept corresponds to the herbaceous perennial growth form; the other growth form coefficients are deviations from this baseline.

**Table S5. PGLS regression results for models of vital rate elasticities including biome as a covariate**

| Elasticity           | Parameter           | Coefficient | SE    | t      | P      |
|----------------------|---------------------|-------------|-------|--------|--------|
| <b>Seed mass</b>     |                     |             |       |        |        |
| Survival             | Intercept           | 2.586       | 2.307 | 1.121  | 0.2637 |
| Survival             | Trait effect        | 0.251       | 0.064 | 3.940  | 0.0001 |
| Survival             | Desert              | -1.825      | 0.649 | -2.812 | 0.0055 |
| Survival             | Temperate forest    | -1.121      | 0.514 | -2.180 | 0.0305 |
| Survival             | Temperate grassland | -1.435      | 0.624 | -2.299 | 0.0226 |
| Survival             | Tropical forest     | -0.425      | 0.796 | -0.534 | 0.5940 |
| Survival             | Tropical grassland  | -1.185      | 0.672 | -1.763 | 0.0795 |
| Growth               | Intercept           | -3.052      | 2.051 | -1.488 | 0.1385 |
| Growth               | Trait effect        | -0.160      | 0.057 | -2.823 | 0.0053 |
| Growth               | Desert              | 1.260       | 0.577 | 2.182  | 0.0303 |
| Growth               | Temperate forest    | 0.825       | 0.457 | 1.805  | 0.0727 |
| Growth               | Temperate grassland | 0.736       | 0.555 | 1.327  | 0.1863 |
| Growth               | Tropical forest     | 0.009       | 0.707 | 0.013  | 0.9896 |
| Growth               | Tropical grassland  | 0.593       | 0.598 | 0.993  | 0.3221 |
| Fecundity            | Intercept           | -5.342      | 4.558 | -1.172 | 0.2427 |
| Fecundity            | Trait effect        | 0.080       | 0.126 | 0.633  | 0.5277 |
| Fecundity            | Desert              | 1.442       | 1.282 | 1.125  | 0.2622 |
| Fecundity            | Temperate forest    | 0.905       | 1.016 | 0.891  | 0.3742 |
| Fecundity            | Temperate grassland | 2.225       | 1.233 | 1.805  | 0.0728 |
| Fecundity            | Tropical forest     | 0.504       | 1.572 | 0.321  | 0.7489 |
| Fecundity            | Tropical grassland  | 2.807       | 1.328 | 2.113  | 0.0359 |
| <b>Wood density</b>  |                     |             |       |        |        |
| Survival             | Intercept           | 0.412       | 2.433 | 0.169  | 0.8660 |
| Survival             | Trait effect        | 5.033       | 1.619 | 3.108  | 0.0028 |
| Survival             | Desert              | -2.750      | 2.254 | -1.220 | 0.2268 |
| Survival             | Temperate forest    | -1.233      | 1.278 | -0.965 | 0.3382 |
| Survival             | Temperate grassland | -1.155      | 1.410 | -0.819 | 0.4156 |
| Survival             | Tropical forest     | 0.940       | 1.455 | 0.646  | 0.5204 |
| Survival             | Tropical grassland  | -0.956      | 1.529 | -0.626 | 0.5338 |
| Growth               | Intercept           | -0.658      | 2.365 | -0.278 | 0.7816 |
| Growth               | Trait effect        | -4.326      | 1.574 | -2.748 | 0.0077 |
| Growth               | Desert              | 2.105       | 2.191 | 0.961  | 0.3402 |
| Growth               | Temperate forest    | 0.340       | 1.242 | 0.274  | 0.7852 |
| Growth               | Temperate grassland | 0.063       | 1.370 | 0.046  | 0.9633 |
| Growth               | Tropical forest     | -1.468      | 1.415 | -1.038 | 0.3033 |
| Growth               | Tropical grassland  | 0.375       | 1.486 | 0.252  | 0.8018 |
| Fecundity            | Intercept           | -0.859      | 2.902 | -0.296 | 0.7682 |
| Fecundity            | Trait effect        | -4.601      | 1.932 | -2.381 | 0.0202 |
| Fecundity            | Desert              | 1.490       | 2.689 | 0.554  | 0.5815 |
| Fecundity            | Temperate forest    | -0.693      | 1.525 | -0.455 | 0.6509 |
| Fecundity            | Temperate grassland | 0.164       | 1.682 | 0.097  | 0.9229 |
| Fecundity            | Tropical forest     | -1.836      | 1.736 | -1.057 | 0.2943 |
| Fecundity            | Tropical grassland  | -0.874      | 1.824 | -0.479 | 0.6333 |
| <b>Leaf lifespan</b> |                     |             |       |        |        |
| Survival             | Intercept           | -0.684      | 1.782 | -0.384 | 0.7047 |
| Survival             | Trait effect        | 1.027       | 0.400 | 2.564  | 0.0181 |
| Survival             | Desert              | -1.137      | 1.228 | -0.926 | 0.3650 |
| Survival             | Temperate forest    | -0.453      | 0.914 | -0.496 | 0.6250 |
| Survival             | Temperate grassland | -2.244      | 1.302 | -1.723 | 0.0995 |
| Survival             | Tropical forest     | 0.319       | 1.101 | 0.290  | 0.7748 |
| Growth               | Intercept           | -0.976      | 3.730 | -0.262 | 0.7961 |
| Growth               | Trait effect        | -0.499      | 0.838 | -0.595 | 0.5583 |
| Growth               | Desert              | 0.542       | 2.570 | 0.211  | 0.8349 |
| Growth               | Temperate forest    | -1.010      | 1.913 | -0.528 | 0.6031 |
| Growth               | Temperate grassland | 1.057       | 2.726 | 0.388  | 0.7020 |
| Growth               | Tropical forest     | -1.461      | 2.305 | -0.634 | 0.5329 |
| Fecundity            | Intercept           | -9.827      | 3.410 | -2.882 | 0.0089 |
| Fecundity            | Trait effect        | -0.658      | 0.766 | -0.859 | 0.4002 |
| Fecundity            | Desert              | 8.535       | 2.350 | 3.632  | 0.0016 |
| Fecundity            | Temperate forest    | 8.171       | 1.749 | 4.671  | 0.0001 |
| Fecundity            | Temperate grassland | 9.116       | 2.492 | 3.658  | 0.0015 |
| Fecundity            | Tropical forest     | 7.514       | 2.108 | 3.565  | 0.0018 |

Table S5. Cont.

| Elasticity | Parameter           | Coefficient | SE    | <i>t</i> | <i>P</i> |
|------------|---------------------|-------------|-------|----------|----------|
| SLA        |                     |             |       |          |          |
| Survival   | Intercept           | 4.846       | 2.606 | 1.859    | 0.0653   |
| Survival   | Trait effect        | -0.805      | 0.331 | -2.434   | 0.0163   |
| Survival   | Desert              | -3.423      | 0.825 | -4.149   | 0.0001   |
| Survival   | Temperate forest    | -0.643      | 0.568 | -1.132   | 0.2598   |
| Survival   | Temperate grassland | -0.422      | 0.672 | -0.628   | 0.5313   |
| Survival   | Tropical forest     | 0.930       | 0.841 | 1.106    | 0.2707   |
| Survival   | Tropical grassland  | -0.750      | 0.962 | -0.780   | 0.4370   |
| Growth     | Intercept           | -4.725      | 2.610 | -1.810   | 0.0726   |
| Growth     | Trait effect        | 0.509       | 0.331 | 1.535    | 0.1272   |
| Growth     | Desert              | 2.527       | 0.826 | 3.058    | 0.0027   |
| Growth     | Temperate forest    | 0.424       | 0.569 | 0.745    | 0.4577   |
| Growth     | Temperate grassland | 0.077       | 0.673 | 0.115    | 0.9085   |
| Growth     | Tropical forest     | -0.741      | 0.842 | -0.880   | 0.3803   |
| Growth     | Tropical grassland  | 0.319       | 0.963 | 0.331    | 0.7411   |
| Fecundity  | Intercept           | -5.814      | 5.302 | -1.097   | 0.2749   |
| Fecundity  | Trait effect        | 0.062       | 0.673 | 0.093    | 0.9264   |
| Fecundity  | Desert              | -0.445      | 1.678 | -0.265   | 0.7914   |
| Fecundity  | Temperate forest    | 1.398       | 1.156 | 1.209    | 0.2287   |
| Fecundity  | Temperate grassland | 1.842       | 1.366 | 1.348    | 0.1799   |
| Fecundity  | Tropical forest     | -1.207      | 1.710 | -0.706   | 0.4816   |
| Fecundity  | Tropical grassland  | 5.141       | 1.956 | 2.628    | 0.0096   |
| Leaf N     |                     |             |       |          |          |
| Survival   | Intercept           | 1.192       | 2.322 | 0.513    | 0.6089   |
| Survival   | Trait effect        | 0.612       | 0.379 | 1.615    | 0.1095   |
| Survival   | Desert              | -1.145      | 1.009 | -1.134   | 0.2594   |
| Survival   | Temperate forest    | -0.556      | 0.680 | -0.818   | 0.4155   |
| Survival   | Temperate grassland | -0.623      | 0.737 | -0.845   | 0.4001   |
| Survival   | Tropical forest     | 1.420       | 0.780 | 1.821    | 0.0717   |
| Survival   | Tropical grassland  | 0.295       | 0.836 | 0.352    | 0.7254   |
| Growth     | Intercept           | -1.052      | 2.287 | -0.460   | 0.6467   |
| Growth     | Trait effect        | -0.818      | 0.373 | -2.190   | 0.0309   |
| Growth     | Desert              | 1.083       | 0.994 | 1.090    | 0.2784   |
| Growth     | Temperate forest    | -0.010      | 0.670 | -0.016   | 0.9876   |
| Growth     | Temperate grassland | 0.135       | 0.726 | 0.186    | 0.8525   |
| Growth     | Tropical forest     | -1.580      | 0.768 | -2.057   | 0.0423   |
| Growth     | Tropical grassland  | -1.031      | 0.824 | -1.251   | 0.2138   |
| Fecundity  | Intercept           | -14.587     | 5.510 | -2.647   | 0.0094   |
| Fecundity  | Trait effect        | 2.645       | 0.900 | 2.940    | 0.0041   |
| Fecundity  | Desert              | 2.366       | 2.395 | 0.988    | 0.3256   |
| Fecundity  | Temperate forest    | 2.731       | 1.614 | 1.692    | 0.0938   |
| Fecundity  | Temperate grassland | 2.507       | 1.748 | 1.434    | 0.1547   |
| Fecundity  | Tropical forest     | 1.520       | 1.851 | 0.821    | 0.4135   |
| Fecundity  | Tropical grassland  | 7.441       | 1.985 | 3.749    | 0.0003   |

For each model, the overall intercept corresponds to the Arctic biome; the other biome coefficients are deviations from this baseline.

**Table S6. PGLS regression results for models of vital rates including growth form as a covariate**

| Vital rate           | Parameter    | Coefficient | SE    | <i>t</i> | <i>P</i> |
|----------------------|--------------|-------------|-------|----------|----------|
| <b>Seed mass</b>     |              |             |       |          |          |
| Survival             | Intercept    | 3.183       | 3.750 | 0.849    | 0.3971   |
| Survival             | Trait effect | 0.222       | 0.107 | 2.078    | 0.0390   |
| Survival             | Palm         | -0.614      | 4.076 | -0.151   | 0.8805   |
| Survival             | Shrub        | -3.631      | 0.863 | -4.206   | 0.0000   |
| Survival             | Succulent    | -1.162      | 3.061 | -0.379   | 0.7048   |
| Survival             | Tree         | -1.864      | 1.124 | -1.658   | 0.0989   |
| Growth               | Intercept    | -0.584      | 1.731 | -0.337   | 0.7363   |
| Growth               | Trait effect | -0.103      | 0.049 | -2.094   | 0.0376   |
| Growth               | Palm         | -1.114      | 1.882 | -0.592   | 0.5546   |
| Growth               | Shrub        | -1.013      | 0.399 | -2.542   | 0.0118   |
| Growth               | Succulent    | -1.266      | 1.413 | -0.896   | 0.3716   |
| Growth               | Tree         | -1.308      | 0.519 | -2.521   | 0.0125   |
| Fecundity            | Intercept    | -1.643      | 6.118 | -0.269   | 0.7885   |
| Fecundity            | Trait effect | -0.261      | 0.174 | -1.498   | 0.1359   |
| Fecundity            | Palm         | 6.293       | 6.651 | 0.946    | 0.3453   |
| Fecundity            | Shrub        | 3.060       | 1.409 | 2.172    | 0.0311   |
| Fecundity            | Succulent    | 7.968       | 4.995 | 1.595    | 0.1124   |
| Fecundity            | Tree         | 2.493       | 1.834 | 1.360    | 0.1755   |
| <b>Wood density</b>  |              |             |       |          |          |
| Survival             | Intercept    | -0.723      | 1.906 | -0.379   | 0.7057   |
| Survival             | Trait effect | 5.904       | 1.486 | 3.974    | 0.0002   |
| Survival             | Palm         | 1.196       | 2.393 | 0.500    | 0.6189   |
| Survival             | Shrub        | 0.165       | 1.178 | 0.141    | 0.8887   |
| Survival             | Tree         | 0.412       | 0.971 | 0.425    | 0.6723   |
| Growth               | Intercept    | 0.470       | 2.040 | 0.230    | 0.8185   |
| Growth               | Trait effect | -0.192      | 1.590 | -0.121   | 0.9044   |
| Growth               | Palm         | -2.837      | 2.561 | -1.108   | 0.2719   |
| Growth               | Shrub        | -0.526      | 1.261 | -0.417   | 0.6781   |
| Growth               | Tree         | -2.730      | 1.039 | -2.628   | 0.0106   |
| Fecundity            | Intercept    | 6.700       | 5.555 | 1.206    | 0.2321   |
| Fecundity            | Trait effect | -19.305     | 4.331 | -4.458   | 0.0000   |
| Fecundity            | Palm         | -1.770      | 6.974 | -0.254   | 0.8004   |
| Fecundity            | Shrub        | 2.901       | 3.433 | 0.845    | 0.4011   |
| Fecundity            | Tree         | 3.220       | 2.829 | 1.138    | 0.2591   |
| <b>Leaf lifespan</b> |              |             |       |          |          |
| Survival             | Intercept    | -1.189      | 1.585 | -0.750   | 0.4606   |
| Survival             | Trait effect | 1.122       | 0.349 | 3.217    | 0.0038   |
| Survival             | Shrub        | 0.024       | 0.926 | 0.026    | 0.9797   |
| Survival             | Tree         | 0.411       | 0.656 | 0.626    | 0.5372   |
| Growth               | Intercept    | 0.515       | 1.567 | 0.328    | 0.7455   |
| Growth               | Trait effect | -0.670      | 0.345 | -1.944   | 0.0642   |
| Growth               | Shrub        | -0.516      | 0.916 | -0.563   | 0.5787   |
| Growth               | Tree         | -0.702      | 0.648 | -1.083   | 0.2902   |
| Fecundity            | Intercept    | 4.686       | 5.629 | 0.832    | 0.4137   |
| Fecundity            | Trait effect | -2.532      | 1.239 | -2.044   | 0.0525   |
| Fecundity            | Shrub        | -2.229      | 3.290 | -0.678   | 0.5048   |
| Fecundity            | Tree         | 5.145       | 2.329 | 2.209    | 0.0374   |
| <b>SLA</b>           |              |             |       |          |          |
| Survival             | Intercept    | 3.257       | 3.967 | 0.821    | 0.4131   |
| Survival             | Trait effect | -0.879      | 0.475 | -1.848   | 0.0669   |
| Survival             | Palm         | 1.227       | 4.154 | 0.295    | 0.7682   |
| Survival             | Shrub        | -0.049      | 1.173 | -0.042   | 0.9666   |
| Survival             | Tree         | 1.202       | 1.173 | 1.025    | 0.3071   |
| Growth               | Intercept    | -1.043      | 2.055 | -0.508   | 0.6125   |
| Growth               | Trait effect | 0.217       | 0.246 | 0.883    | 0.3788   |
| Growth               | Palm         | -1.517      | 2.152 | -0.705   | 0.4819   |
| Growth               | Shrub        | -0.557      | 0.608 | -0.917   | 0.3608   |
| Growth               | Tree         | -1.530      | 0.607 | -2.519   | 0.0130   |
| Fecundity            | Intercept    | -3.693      | 7.535 | -0.490   | 0.6248   |
| Fecundity            | Trait effect | 1.113       | 0.903 | 1.233    | 0.2199   |
| Fecundity            | Palm         | 3.491       | 7.891 | 0.442    | 0.6589   |
| Fecundity            | Shrub        | 3.061       | 2.229 | 1.373    | 0.1720   |

**Table S6. Cont.**

| Vital rate | Parameter    | Coefficient | SE    | <i>t</i> | <i>P</i> |
|------------|--------------|-------------|-------|----------|----------|
| Fecundity  | Tree         | 1.810       | 2.227 | 0.813    | 0.4178   |
| Leaf N     |              |             |       |          |          |
| Survival   | Intercept    | 0.175       | 1.714 | 0.102    | 0.9191   |
| Survival   | Trait effect | 0.142       | 0.273 | 0.520    | 0.6040   |
| Survival   | Palm         | 1.080       | 1.610 | 0.671    | 0.5037   |
| Survival   | Shrub        | 0.493       | 0.463 | 1.065    | 0.2893   |
| Survival   | Tree         | 1.853       | 0.453 | 4.088    | 0.0001   |
| Growth     | Intercept    | 0.475       | 2.129 | 0.223    | 0.8238   |
| Growth     | Trait effect | -0.167      | 0.339 | -0.492   | 0.6240   |
| Growth     | Palm         | -1.398      | 2.000 | -0.699   | 0.4860   |
| Growth     | Shrub        | -0.281      | 0.575 | -0.489   | 0.6261   |
| Growth     | Tree         | -1.917      | 0.563 | -3.404   | 0.0010   |
| Fecundity  | Intercept    | -0.054      | 6.802 | -0.008   | 0.9937   |
| Fecundity  | Trait effect | 0.105       | 1.083 | 0.097    | 0.9229   |
| Fecundity  | Palm         | 4.506       | 6.388 | 0.705    | 0.4822   |
| Fecundity  | Shrub        | 0.663       | 1.838 | 0.361    | 0.7190   |
| Fecundity  | Tree         | 0.237       | 1.799 | 0.132    | 0.8956   |

For each model, the overall intercept corresponds to the herbaceous perennial growth form; the other growth form coefficients are deviations from this baseline.



**Table S7. Cont.**

| Vital rate    | Parameter           | Coefficient | SE    | <i>t</i> | <i>P</i> |
|---------------|---------------------|-------------|-------|----------|----------|
| <b>SLA</b>    |                     |             |       |          |          |
| Survival      | Intercept           | 3.580       | 3.833 | 0.934    | 0.3520   |
| Survival      | Trait effect        | -0.643      | 0.487 | -1.322   | 0.1884   |
| Survival      | Desert              | 1.996       | 1.213 | 1.645    | 0.1024   |
| Survival      | Temperate forest    | -0.081      | 0.836 | -0.097   | 0.9229   |
| Survival      | Temperate grassland | -0.916      | 0.988 | -0.927   | 0.3554   |
| Survival      | Tropical forest     | 1.041       | 1.236 | 0.842    | 0.4014   |
| Survival      | Tropical grassland  | -0.004      | 1.414 | -0.003   | 0.9976   |
| Growth        | Intercept           | -2.810      | 1.992 | -1.411   | 0.1608   |
| Growth        | Trait effect        | 0.475       | 0.253 | 1.878    | 0.0627   |
| Growth        | Desert              | 1.246       | 0.631 | 1.976    | 0.0503   |
| Growth        | Temperate forest    | 0.183       | 0.434 | 0.421    | 0.6748   |
| Growth        | Temperate grassland | -0.158      | 0.513 | -0.309   | 0.7582   |
| Growth        | Tropical forest     | -0.949      | 0.643 | -1.476   | 0.1423   |
| Growth        | Tropical grassland  | 0.092       | 0.735 | 0.126    | 0.9001   |
| Fecundity     | Intercept           | -4.009      | 7.365 | -0.544   | 0.5872   |
| Fecundity     | Trait effect        | 1.402       | 0.935 | 1.499    | 0.1363   |
| Fecundity     | Desert              | 3.107       | 2.331 | 1.333    | 0.1851   |
| Fecundity     | Temperate forest    | 0.773       | 1.606 | 0.481    | 0.6313   |
| Fecundity     | Temperate grassland | 1.661       | 1.898 | 0.875    | 0.3830   |
| Fecundity     | Tropical forest     | 0.453       | 2.376 | 0.191    | 0.8491   |
| Fecundity     | Tropical grassland  | 4.776       | 2.718 | 1.758    | 0.0812   |
| <b>Leaf N</b> |                     |             |       |          |          |
| Survival      | Intercept           | 1.519       | 1.787 | 0.850    | 0.3973   |
| Survival      | Trait effect        | 0.118       | 0.292 | 0.404    | 0.6872   |
| Survival      | Desert              | -0.098      | 0.777 | -0.126   | 0.8997   |
| Survival      | Temperate forest    | -0.102      | 0.524 | -0.195   | 0.8462   |
| Survival      | Temperate grassland | -0.527      | 0.567 | -0.930   | 0.3547   |
| Survival      | Tropical forest     | 1.072       | 0.600 | 1.787    | 0.0771   |
| Survival      | Tropical grassland  | 0.573       | 0.644 | 0.889    | 0.3759   |
| Growth        | Intercept           | -0.677      | 2.151 | -0.315   | 0.7537   |
| Growth        | Trait effect        | -0.155      | 0.351 | -0.442   | 0.6597   |
| Growth        | Desert              | -0.127      | 0.935 | -0.135   | 0.8926   |
| Growth        | Temperate forest    | 0.058       | 0.630 | 0.092    | 0.9269   |
| Growth        | Temperate grassland | -0.901      | 0.682 | -1.319   | 0.1901   |
| Growth        | Tropical forest     | -1.432      | 0.723 | -1.981   | 0.0503   |
| Growth        | Tropical grassland  | -0.838      | 0.775 | -1.082   | 0.2819   |
| Fecundity     | Intercept           | -4.417      | 6.604 | -0.669   | 0.5052   |
| Fecundity     | Trait effect        | 0.395       | 1.078 | 0.366    | 0.7150   |
| Fecundity     | Desert              | 1.607       | 2.871 | 0.560    | 0.5768   |
| Fecundity     | Temperate forest    | 4.059       | 1.935 | 2.098    | 0.0384   |
| Fecundity     | Temperate grassland | 3.334       | 2.095 | 1.591    | 0.1147   |
| Fecundity     | Tropical forest     | 3.060       | 2.218 | 1.380    | 0.1708   |
| Fecundity     | Tropical grassland  | 6.643       | 2.379 | 2.793    | 0.0063   |

For each model, the overall intercept corresponds to the Arctic biome; the other biome coefficients are deviations from this baseline.
